# Supplementary material for: Explaining entrepreneurial performance of solo self-employed from a motivational perspective
Source: Springer Nature journal article supplement (doi:10.1007/s11187-019-00244-8), 2019-08-16
Supplement: MOESM1 [file 17077314]

ONLINE APPENDIX

TABLE A1

Manual classification by authors into opportunity and necessity start-up motives (*Necessity2*)

| Which reason(s) played a role in your decision to become solo self-employed? | Opportunity or necessity? |
| --- | --- |
| I can earn more as solo self-employed. | Opportunity |
| The contents of the work as solo self-employed are more satisfying. | Opportunity |
| I wanted to be my own boss and be able to make my own decisions. | Opportunity |
| As solo self-employed I am better able to combine work and care. | Necessity |
| I have many solo self-employed friends and family members. | Opportunity |
| I wanted to contribute to the society. | Opportunity |
| I found that my income as an employee was too low. | Opportunity |
| The company that I worked for performed poorly (or, went bankrupt). | Necessity |
| I could not find a suitable paid job. | Necessity |
| I was in danger of becoming unemployed. | Necessity |
| For my former employer, it was more attractive to hire me as solo self-employed instead of retaining me as an employee. | Necessity |
| It was the only possibility to keep working for my former employer. | Necessity |
| I turned my hobby into a career as solo self-employed. | Opportunity |
| My kind of work can only be done as solo self-employed. | Necessity |
| I had reached retirement age (or, I was retired). | Necessity |
| It started as a part-time job for some extra income. | Opportunity |
| I had a conflict at and/or was dissatisfied with my former job. | Necessity |
| For tax reasons. | Opportunity |
| For legal reasons. | Necessity |
| For health reasons. | Necessity |
| A corporate takeover within the family. | Necessity |

Classification based on a multiple-choice question, and validated by checking the correlation between each answer category and self-proclaimed necessity solo self-employment (*Necessity1*).

**TABLE A2**

**Overlap between different necessity indicators**

| **Necessity indicator** | **Total number of cases** | **Overlap with:** | | |
| --- | --- | --- | --- | --- |
| *Unemployed* | *Necessity1* | *Necessity2* |
| *Unemployed* | 107 | N/A | 54 | 47 |
| *Necessity1* | 472 | 54 | N/A | 226 |
| *Necessity2* | 448 | 47 | 226 | N/A |

TABLE A3

Variable description

| Variable | Description |
| --- | --- |
| *Annual turnover* | Expectation (per ultimo November) of the firm’s turnover in the current year (1 = Less than 10,000 euro, 2 = 10,000 up to 25,000 euro, 3 = 25,000 up to 50,000 euro, 4 = 50,000 up to 100,000 euro, 5 = 100,000 up to 200,000 euro, 6 = 200,000 up to 500,000 euro, and 7 = 500,000 euro or more). |
| *Unemployed* | Respondent’s labor market situation prior to becoming solo self-employed was unemployed/incapacitated/entitled to benefits (0 = No, 1 = Yes). |
| *Necessity1* | Becoming solo self-employed was the only option for suitable paid work at the time the respondent started as solo self-employed (0 = No, 1 = Yes). |
| *Necessity2* | Respondent is classified as a necessity type based on his/her reason(s) that played a role in his/her decision to become solo self-employed (0 = No, 1 = Yes). |
| *Year 2011* | Calendar year in which the wave has been conducted is 2011 (0 = No, 1 = Yes). |
| *Age* | Age of the respondent (in years). |
| *Age (squared)* | Squared age of the respondent (in years). |
| *Female* | Gender of the respondent is female (0 = No, 1 = Yes). |
| *Educ. level medium* | Respondent has a medium educational level (0 = No, 1 = Yes). |
| *Educ. level high* | Respondent has a high educational level, i.e. a bachelor’s or master’s degree (0 = No, 1 = Yes). |
| *Firm age* | Age of the firm (in years). |
| *Firm age (squared)* | Squared age of the firm (in years). |
| *Unpaid family worker* | Respondent runs his/her firm together with an unpaid family worker (0 = No, 1 = Yes). |
| *25-40 hours per week* | Number of hours per week spent on running the firm is 25 up to 40 (0 = No, 1 = Yes). |
| *40-60 hours per week* | Number of hours per week spent on running the firm is 40 up to 60 (0 = No, 1 = Yes). |
| *60+ hours per week* | Number of hours per week spent on running the firm is 60 or more (0 = No, 1 = Yes). |
| *Alt. income sufficient* | In case income from business falls out, respondent has sufficient income to make ends meet from alternative income sources (0 = No, 1 = Yes). |
| *Pension savings* | Respondent saves a certain part of his/her income for his/her pension (0 = No, 1 = Yes). |
| *Client mainly B2C* | Main type of clients is individuals (customers) (0 = No, 1 = Yes). |
| *Client equally B2B/B2C* | No main type of clients; as many individuals (customers) as firms/organizations (businesses) (0 = No, 1 = Yes). |
| *Worksite external* | Main worksite of the respondents is at an external location (0 = No, 1 = Yes). |
| *Worksite varying* | Respondent has varying worksites (0 = No, 1 = Yes). |
| Industry dummies | Ten dummy variables for the industry in which the firm is active (for *agriculture*, *manufacturing*, *construction*, *repair/trade/hospitality*, *transport/storage/communication*, *ICT*, *care/wellness*, *education/training*, *business services*, and *other services*). |
